# Supplementary material for: Real-space imaging with pattern recognition of a ligand-protected Ag374 nanocluster at sub-molecular resolution
Source: PubMed Central journal article supplement (PMC6063937; doi:10.1038/s41467-018-05372-5), 2018-07-27
Supplement: 41467_2018_5372_MOESM1_ESM.pdf [file 41467_2018_5372_MOESM1_ESM.pdf]

**SUPPLEMENTARY INFORMATION FOR**

**Real-Space Imaging with Pattern Recognition of a Ligand-Protected Ag<sub>374</sub>  
Nanocluster at Sub-Molecular Resolution**

Zhou et al.

**SUPPLEMENTARY FIGURES**

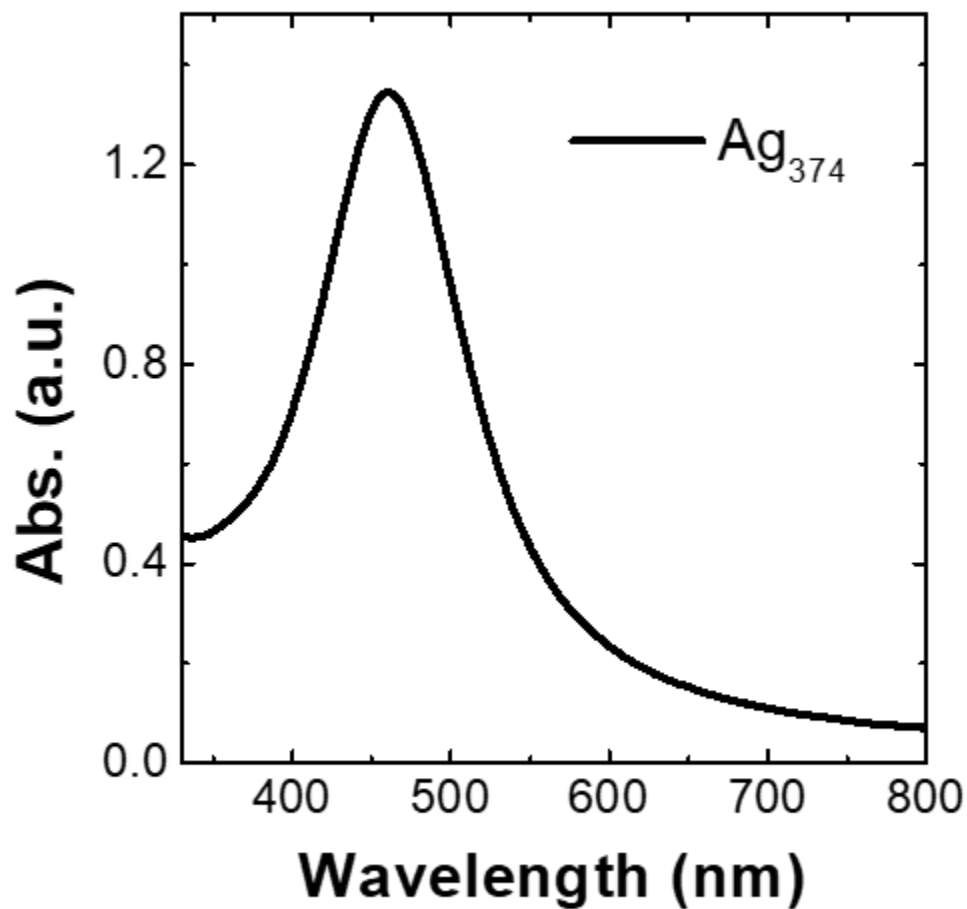

**Supplementary Figure 1.** Optical absorption of  $\text{Ag}_{374}$  as dissolved from crystalline phase before depositing on the dithiol-modified gold surface.

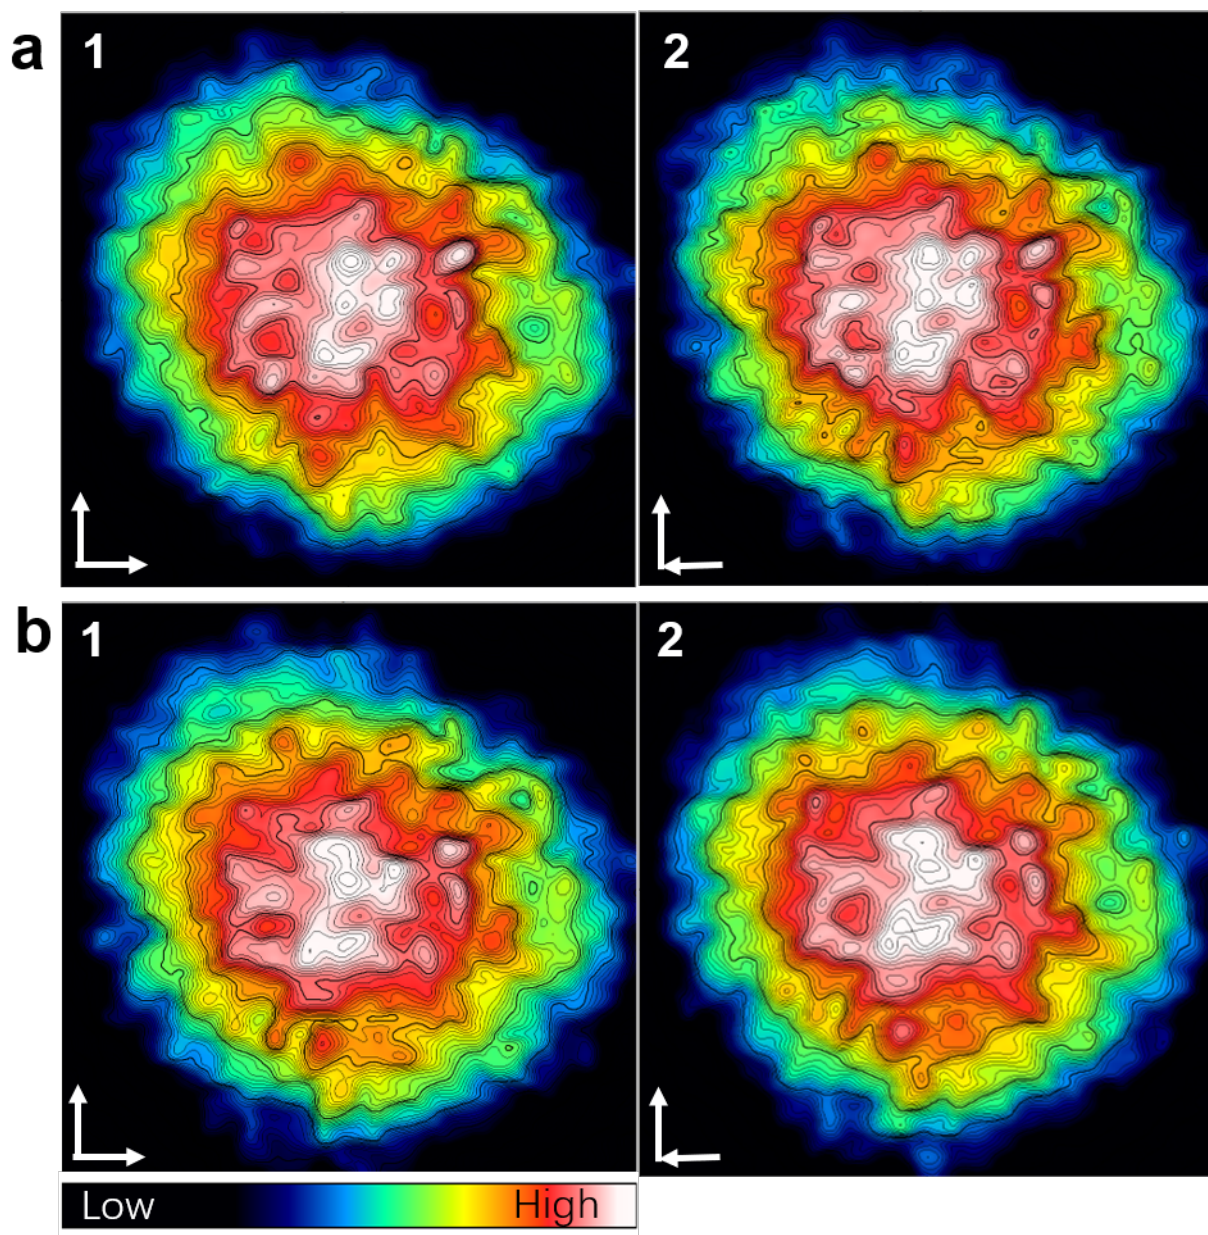

**Supplementary Figure 2.** Repeated scans of the same  $\text{Ag}_{374}$  cluster at LHe temperature. Scan directions are shown by the arrows. **(1)** and **(2)** in **(a,b)** refer to up (or down) images with opposite scanning directions (trace and retrace) marking at left bottom which were recorded simultaneously at a time scale of 7min. Bias voltage: -1.2V, 10pA.  $5.0 \times 5.0$  nm. Images in **(b)** **(1,2)** were selected in calculation in Fig. 4 as the references.

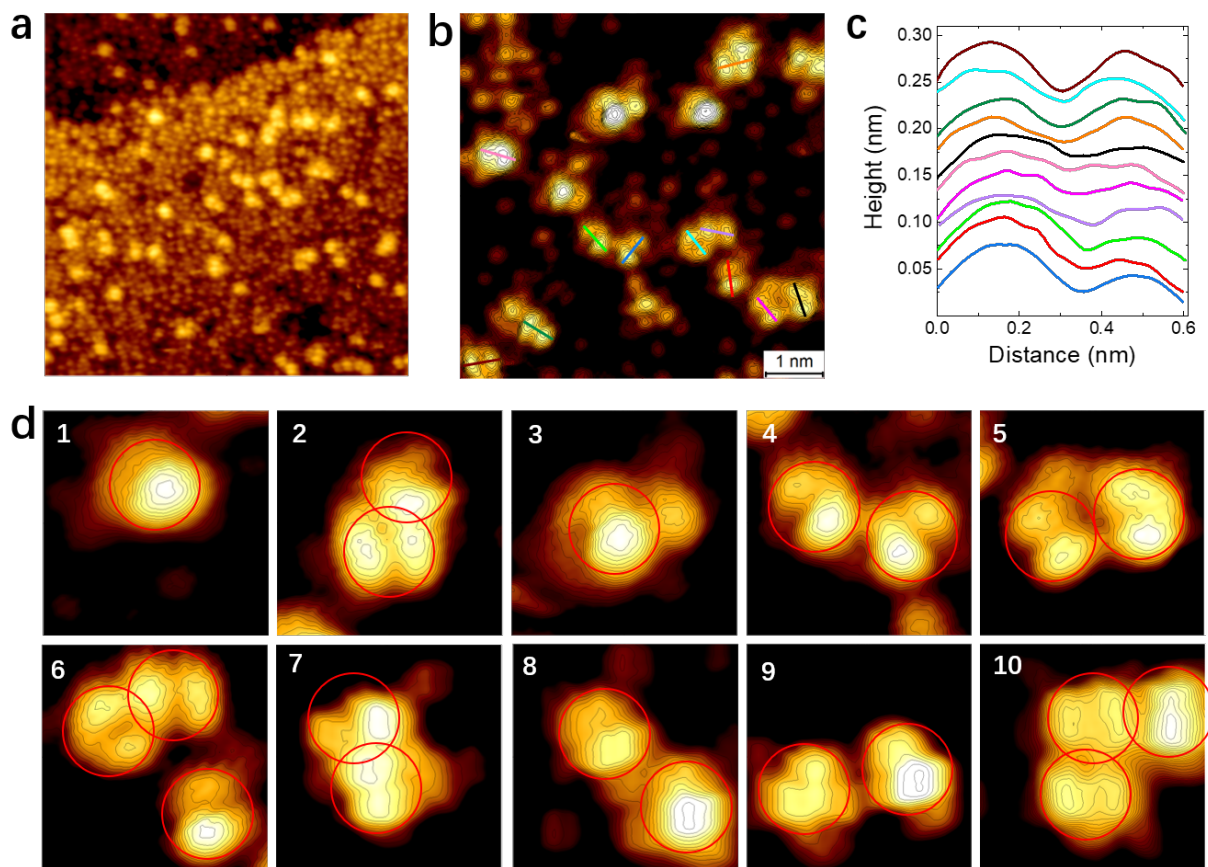

**Supplementary Figure 3.** STM images of the ligand database. **(a)** large scale image where TBTT molecules adsorbed on Au(111) surface with multilayers. Size:  $21.5 \times 21.5 \text{ nm}^2$ , bias and setpoint current: 1.2 V, 40 pA. **(b)** Zoom-in image with bright individual TBTT molecules on the outmost surface. Size:  $6.38 \times 6.38 \text{ nm}^2$ , bias and setpoint current: 1.2 V, 60 pA. **(c)** Height profile for colored lines marked in **(b)**, which were shifted for good visual. **(d)** Part of TBTT image database, each red circle (0.6 nm diameter) indicates one TBTT molecule. All the images were digitally zoomed-in from large area images. Size, bias and setpoint current: **(1-6)**  $1.51 \times 1.51 \text{ nm}$ , 1.2V, 60pA, **(7-10)**  $1.50 \times 1.50 \text{ nm}$ , 1.0V, 30pA. Measured at  $\text{LN}_2$  temperature.

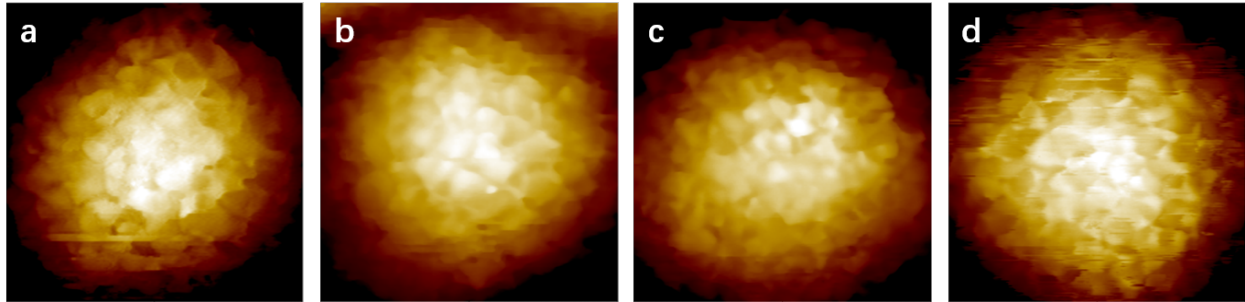

**Supplementary Figure 4.** High-resolution images of  $\text{Ag}_{374}$  at  $\text{LN}_2$  temperature. Four different clusters showing a similar degree of high sub-molecular resolution as shown in Fig. 3 of the main text at LHe temperature. Bias, setpoint current, scanning angle, size: **(a)** -1.4 V, 20 pA,  $0^\circ$ ,  $4.81 \times 4.81 \text{ nm}^2$ ; **(b)** -1.5 V, 40 pA,  $0^\circ$ ,  $4.81 \times 4.81 \text{ nm}^2$ ; **(c)** -1.5 V, 30 pA,  $90^\circ$ ,  $4.80 \times 4.80 \text{ nm}^2$ ; **(d)** -1.2 V, 30 pA,  $45^\circ$ ,  $4.80 \times 4.80 \text{ nm}^2$ .

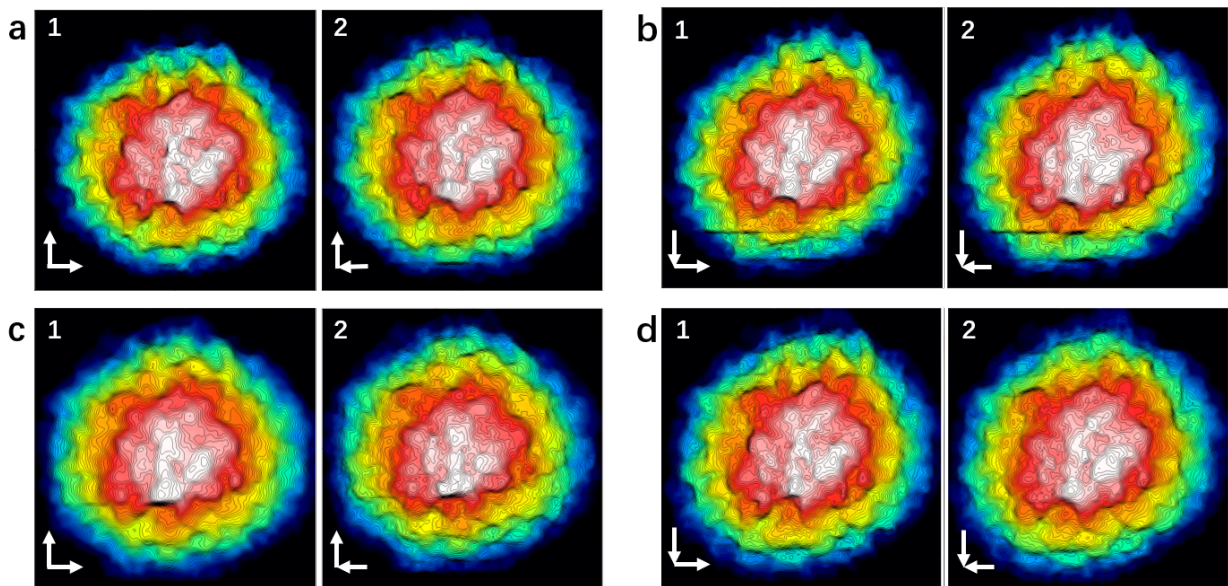

**Supplementary Figure 5.** Continuous scanning of the same  $\text{Ag}_{374}$  cluster at  $\text{LN}_2$  temperature. Scan directions are shown by the arrows. **(1)** and **(2)** in **(a-d)** refer to up (or down) images with opposite scanning directions (trace and retrace) marking at left bottom which were recorded simultaneously at a timescale of 8 min 45 sec. Size:  $4.81 \times 4.81 \text{ nm}^2$ . Bias and setpoint current: -1.4 V, 20 pA.

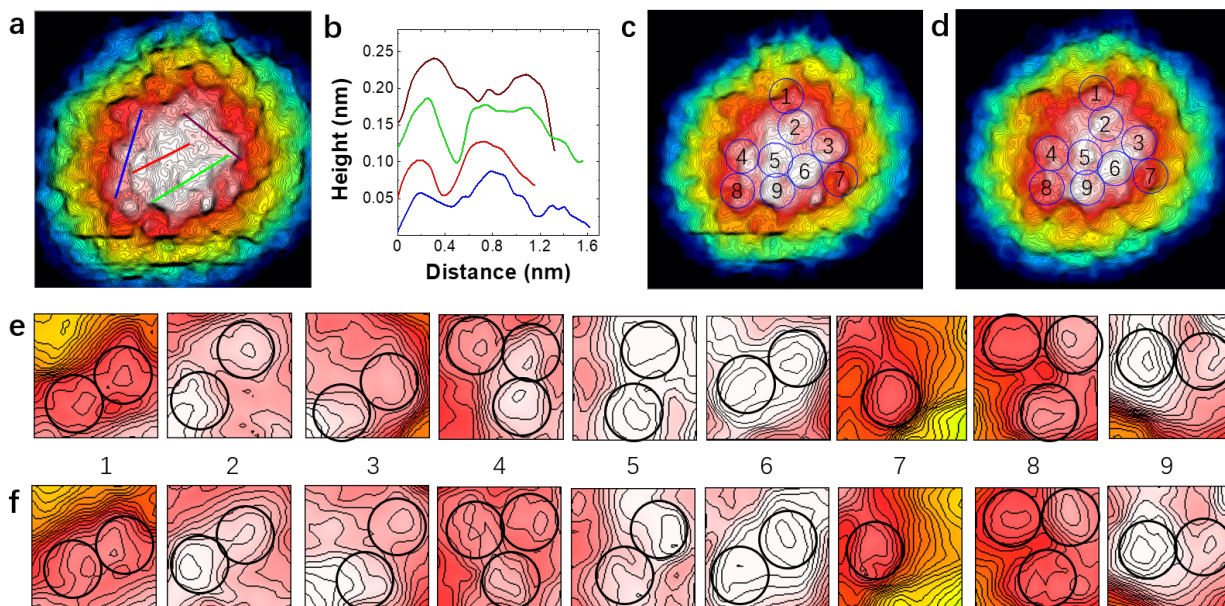

**Supplementary Figure 6.** High resolution image of  $\text{Ag}_{374}$  and the detailed ligand information. **(a)** the same as Fig. S5 b2. **(c)** and **(d)** same as Fig. S5 b2 and d2, respectively. **(b)** Height profile of colored lines marked in **(a)**. The numbered circles 1-9 (diameter 0.6 nm) refer to local areas shown zoomed-in in **(e,f)**. Size:  $4.81 \times 4.81 \text{ nm}^2$ . Bias and setpoint current: -1.4 V, 20 pA. **(e,f)** blow-up of areas 1-9 from **(c)** and **(d)**, respectively. Black circles denote local maxima.

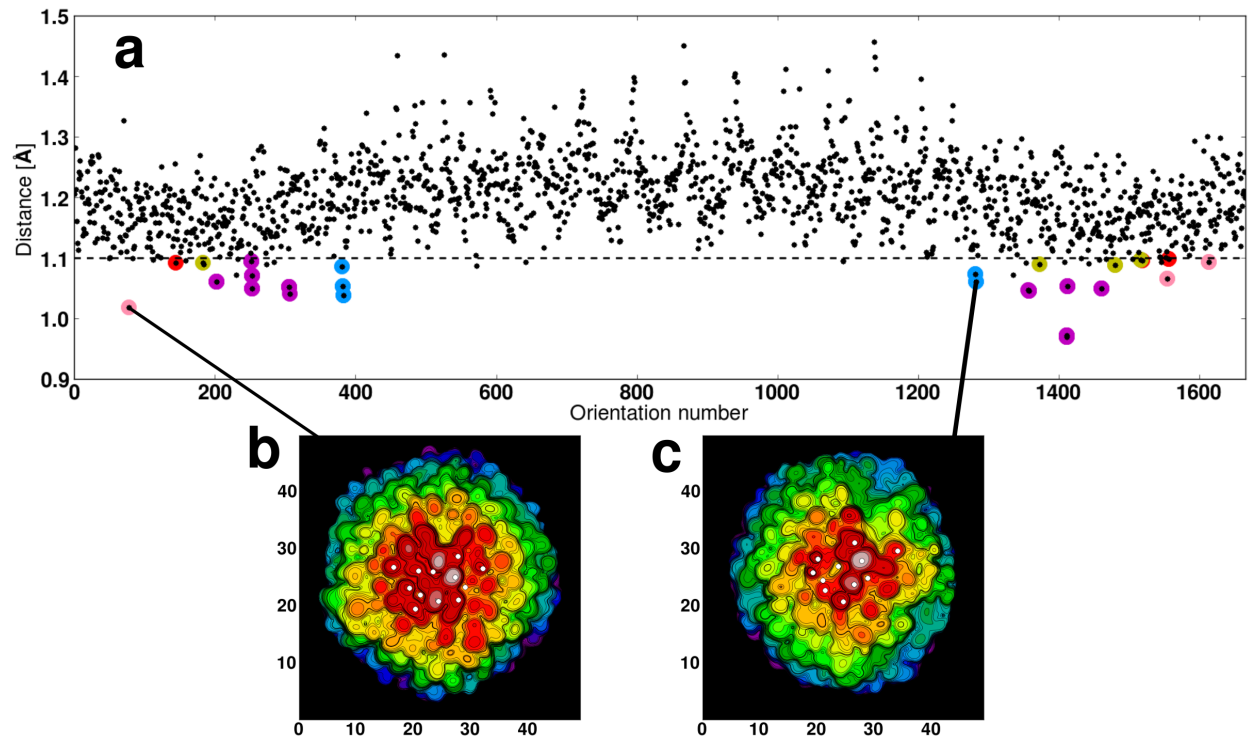

**Supplementary Figure 7.** The facial recognition of the retrace STM data (Fig. 4b). (a) Distance analysis for the STM image in figure 4b. Selected small-distance perspectives are connected with lines to the respective calculated STM images (b,c). The colors are the same as in figure 4d.

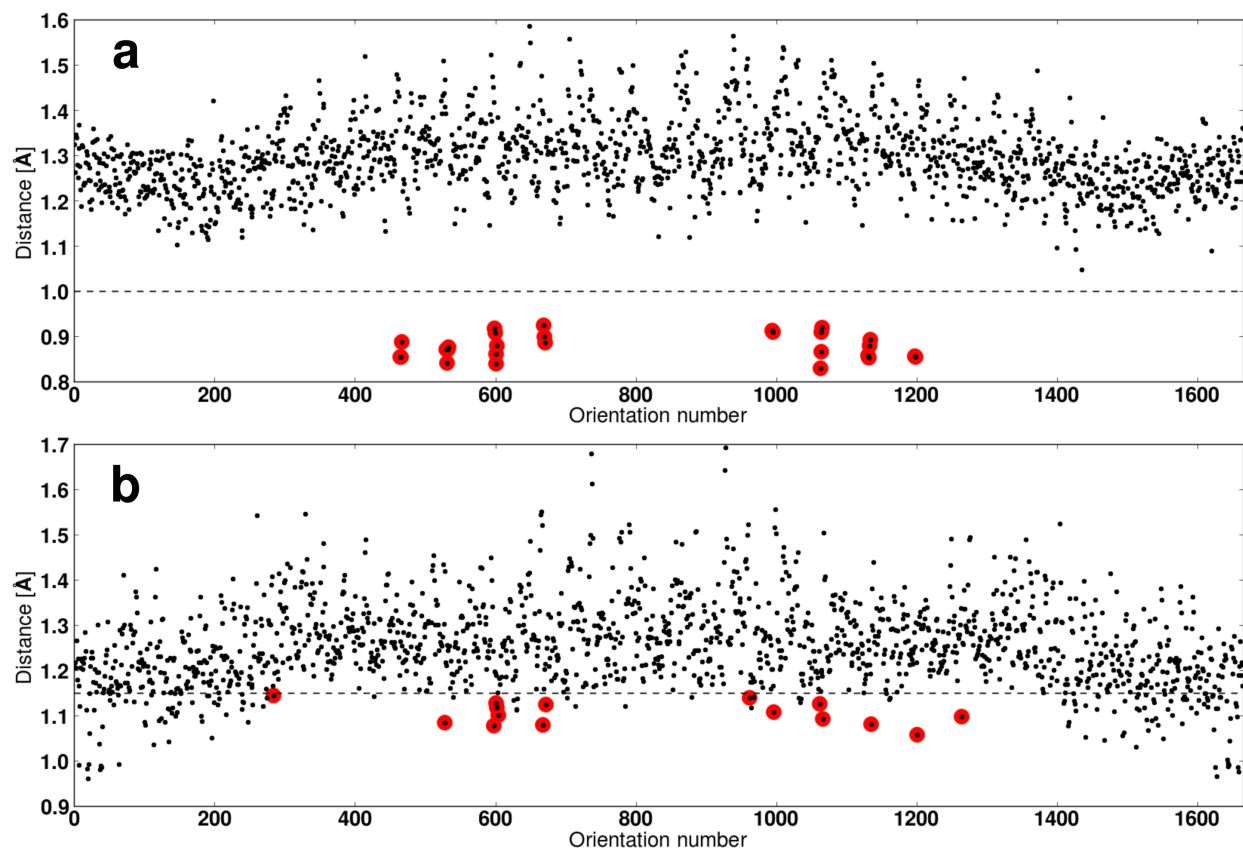

**Supplementary Figure 8.** A test for the facial recognition algorithm. **(a)** The reference set of coordinates was obtained by determining 10 maxima and 3 minima from the calculated STM image number 600, each of which were then randomly deviated in the range  $[0, 1]$  Å to a random direction. This set of points was compared to each calculated STM image. **(b)** Similar to **(a)** with the deviation range of  $[0, 2]$  Å. The red data points correspond to a perspective very close to the reference ie. orientation number 600.



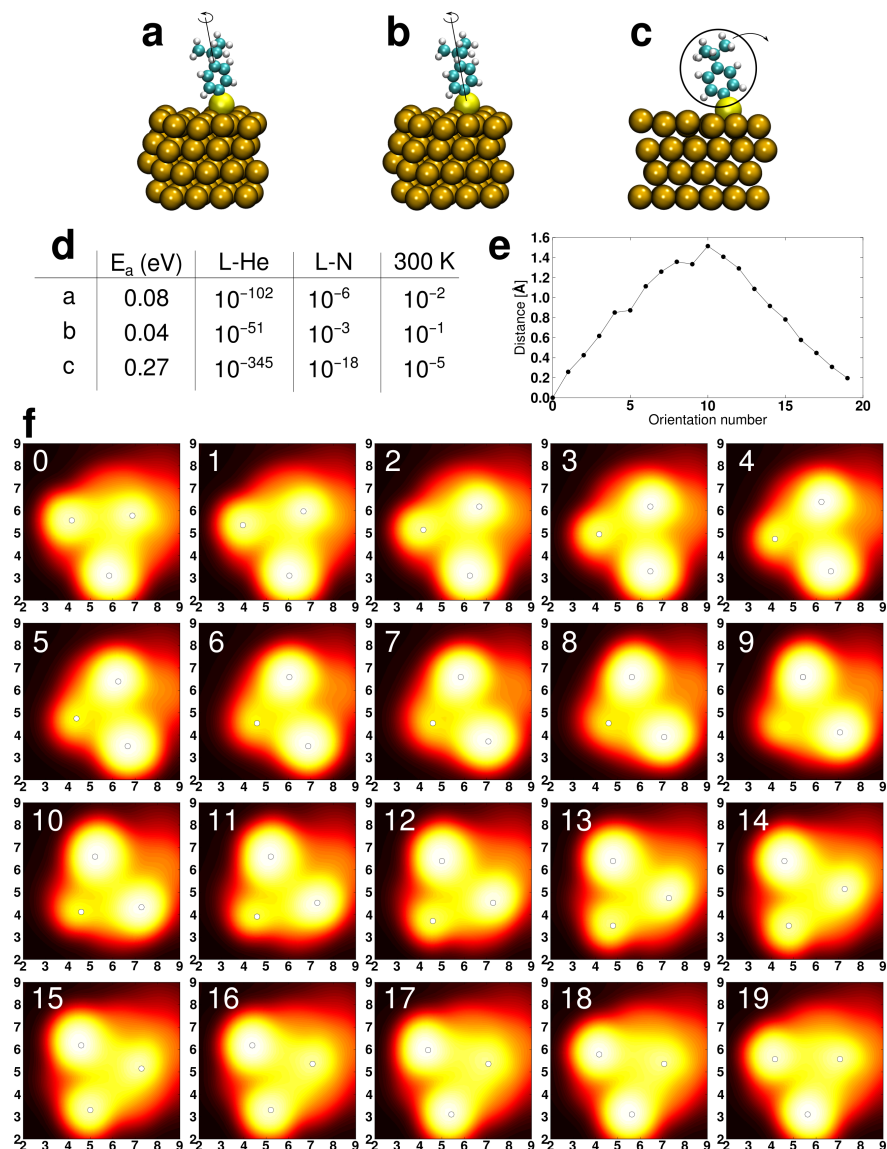

**Supplementary Figure 9.** Determining the rotational barriers and rotation probabilities of a single TBBT molecule absorbed onto bridge site of Au(111) surface. **(a,b,c)** Illustrations of the different rotations that were considered: **(a)** Rotation of the tert-butyl head group. **(b)** Rotation of the thiol around the principal axis. **(c)** Rotation of the thiol around the axis parallel to the surface. **(d)** Rotational barriers and temperature-dependent Boltzmann factors in the Arrhenius equation for rotations a, b and c, referring to the corresponding images. The factors are shown for temperatures of liquid Helium, liquid Nitrogen and 300 K. **(e)** Results of the extremum coordinate comparison for 20 rotations of type **a** where the coordinates of the three maxima, shown for each state in the calculated STM images **(f)**, are compared to the initial state (state number 0) without minimizing with respect to rotations. The maximum distance in **(e)** is 1.5 Å and the mean value 0.8 Å. X-Y scales in **(f)** are shown in Å.
